# Supplementary material for: Correlation of Immunological and Histopathological Features with Gene Expression-Based Classifiers in Colon Cancer Patients
Source: MDPI journal article supplement (doi:10.3390/ijms232012707), 2022-10-21
Supplement: s1 [file s1]

|                                     | CMS1      | CMS2      | CMS3      | CMS4      | <i>p</i> -value |
|-------------------------------------|-----------|-----------|-----------|-----------|-----------------|
| <b>TILs combined with Mucus</b>     |           |           |           |           |                 |
| TILs low or Non-mucinous            | 41 (95.3) | 72 (100)  | 36 (92.3) | 59 (98.3) | 0.097           |
| TILs high <i>and</i> Mucinous       | 2 (4.7)   | 0 (0.0)   | 3 (7.7)   | 1 (1.7)   |                 |
| TILs low and Non-mucinous           | 13 (30.2) | 65 (90.3) | 22 (56.4) | 46 (76.7) | <0.001          |
| TILs high <i>or</i> Mucinous        | 30 (69.8) | 7 (9.7)   | 17 (43.6) | 14 (23.3) |                 |
| TILs low or Mucus <10%              | 34 (79.1) | 72 (100)  | 29 (74.4) | 59 (98.3) | <0.001          |
| TILs high <i>and</i> Mucus ≥10%     | 9 (20.9)  | 0 (0.0)   | 10 (25.6) | 1 (1.7)   |                 |
| TILs low and Mucus <10%             | 7 (16.3)  | 61 (84.7) | 10 (25.6) | 41 (68.3) | <0.001          |
| TILs high <i>or</i> Mucus ≥10%      | 36 (83.7) | 11 (15.3) | 29 (74.4) | 19 (31.7) |                 |
| <b>TSR combined with Budding</b>    |           |           |           |           |                 |
| Stroma-low or Budding low           | 40 (93.0) | 69 (93.2) | 36 (90.0) | 51 (83.6) | 0.257           |
| Stroma-high <i>and</i> Budding high | 3 (7.0)   | 5 (6.8)   | 4 (10.0)  | 10 (16.4) |                 |
| Stroma-low and Budding low          | 25 (58.1) | 49 (66.2) | 26 (65.0) | 25 (41.0) | 0.018           |
| Stroma-high <i>or</i> Budding high  | 18 (41.9) | 25 (33.8) | 14 (35.0) | 36 (59.0) |                 |

**Table S7.** Correlation between different combinations of histopathologic features and CMS subtypes. TILs = tumor infiltrating lymphocytes, TSR = tumor-stroma ratio. P-values are derived from an overall comparison between subtypes.
