# Supplementary material for: Correlation of Immunological and Histopathological Features with Gene Expression-Based Classifiers in Colon Cancer Patients
Source: MDPI journal article supplement (doi:10.3390/ijms232012707), 2022-10-21
Supplement: s1 [file s1]

|            | CRIS-A    | CRIS-B    | CRIS-C    | CRIS-D    | CRIS-E    | <i>p</i> -value |
|------------|-----------|-----------|-----------|-----------|-----------|-----------------|
| <b>pT2</b> | 3 (5.0)   | 0 (0.0)   | 3 (4.8)   | 1 (2.9)   | 0 (0.0)   | 0.875           |
| <b>pT3</b> | 50 (83.3) | 31 (88.6) | 55 (87.3) | 31 (88.6) | 22 (88.0) |                 |
| <b>pT4</b> | 7 (11.7)  | 4 (11.4)  | 5 (7.9)   | 3 (8.6)   | 3 (12.0)  |                 |

**Table S2.** Distribution of CRIS subtypes per pathologic T-stage. P-value is derived from an overall comparison between subtypes.
