# Supplementary material for: Correlation of Immunological and Histopathological Features with Gene Expression-Based Classifiers in Colon Cancer Patients
Source: MDPI journal article supplement (doi:10.3390/ijms232012707), 2022-10-21
Supplement: s1 [file s1]

|                                 | CRIS-A    | CRIS-B    | CRIS-C    | CRIS-D    | CRIS-E    | <i>p</i> -value |
|---------------------------------|-----------|-----------|-----------|-----------|-----------|-----------------|
| <b>TILs combined with Mucus</b> |           |           |           |           |           |                 |
| TILs Low or Non-mucinous        | 54 (91.5) | 34 (97.1) | 62 (100)  | 34 (100)  | 24 (100)  | 0.034           |
| TILs High <i>and</i> Mucinous   | 5 (8.5)   | 1 (2.9)   | 0 (0.0)   | 0 (0.0)   | 0 (0.0)   |                 |
| TILs Low and Non-mucinous       | 24 (40.7) | 19 (54.3) | 55 (88.7) | 28 (82.4) | 20 (83.3) | <0.001          |
| TILs High <i>or</i> Mucinous    | 35 (59.3) | 16 (45.7) | 7 (11.3)  | 6 (17.6)  | 4 (16.7)  |                 |
| TILs Low or Mucus <10%          | 42 (71.2) | 32 (91.4) | 62 (100)  | 34 (100)  | 24 (100)  | <0.001          |
| TILs High <i>and</i> Mucus ≥10% | 17 (28.8) | 3 (8.6)   | 0 (0.0)   | 0 (0.0)   | 0 (0.0)   |                 |
| TILs Low and Mucus <10%         | 10 (16.9) | 16 (45.7) | 50 (80.6) | 26 (76.5) | 17 (70.8) | <0.001          |
| TILs High <i>or</i> Mucus ≥10%  | 49 (83.1) | 19 (54.3) | 12 (19.4) | 8 (23.5)  | 7 (29.2)  |                 |

**Table S8.** Correlation between different combinations of histopathologic features and CRIS subtypes. TILs = tumor infiltrating lymphocytes. P-values are derived from an overall comparison between subtypes.
