# Supplementary material for: Correlation of Immunological and Histopathological Features with Gene Expression-Based Classifiers in Colon Cancer Patients
Source: MDPI journal article supplement (doi:10.3390/ijms232012707), 2022-10-21
Supplement: s1 [file s1]

|            | CMS1      | CMS2      | CMS3      | CMS4      | <i>p</i> -value |
|------------|-----------|-----------|-----------|-----------|-----------------|
| <b>pT2</b> | 0 (0.0)   | 3 (4.1)   | 4 (10.0)  | 0 (0.0)   | 0.041           |
| <b>pT3</b> | 39 (90.7) | 65 (87.8) | 29 (72.5) | 56 (91.8) |                 |
| <b>pT4</b> | 4 (9.3)   | 6 (8.1)   | 7 (17.5)  | 5 (8.2)   |                 |

**Table S1.** Distribution of CMS subtypes per pathologic T-stage. P-value is derived from an overall comparison between subtypes.
