# Supplementary material for: Correlation of Immunological and Histopathological Features with Gene Expression-Based Classifiers in Colon Cancer Patients
Source: MDPI journal article supplement (doi:10.3390/ijms232012707), 2022-10-21
Supplement: s1 [file s1]

|                                | <b>MSI-status</b> |               |                |
|--------------------------------|-------------------|---------------|----------------|
|                                | <i>OR</i>         | <i>95% CI</i> | <i>p-value</i> |
| <b>TILs</b><br>High vs. Low    | 6.571             | 3.102-13.920  | <0.001         |
| <b>Mucus</b><br>>50% vs. ≤50%  | 4.567             | 1.789-11.655  | 0.001          |
| <b>Mucus</b><br>≥10% vs. <10%  | 4.373             | 2.152-8.887   | <0.001         |
| <b>Stroma</b><br>High vs. Low  | 0.363             | 0.157-0.835   | 0.014          |
| <b>Budding</b><br>High vs. Low | 0.968             | 0.406-2.309   | 0.968          |

**Table S6.** Odds Ratios with 95% confidence interval calculated as the likelihood for microsatellite instability if scored into the highest histopathologic category (i.e. TILs-high, Mucus > 50%, Mucus ≥ 10%, Stroma-high and Budding-high). MSI = microsatellite instability, OR = odds ratio, CI = confidence interval, TILs = tumor infiltrating lymphocytes
