# Supplementary material for: Correlation of Immunological and Histopathological Features with Gene Expression-Based Classifiers in Colon Cancer Patients
Source: MDPI journal article supplement (doi:10.3390/ijms232012707), 2022-10-21
Supplement: s1 [file s1]

|                      | pT2      | pT3        | pT4       | p-value |
|----------------------|----------|------------|-----------|---------|
| <b>TILs</b>          |          |            |           |         |
| None/low             | 6 (85.7) | 141 (76.2) | 18 (81.8) | 0.661   |
| Intermediate         | 1 (14.3) | 30 (16.2)  | 4 (18.2)  |         |
| High                 | 0 (0.0)  | 14 (7.6)   | 0 (0.0)   |         |
| <b>Mucus</b>         |          |            |           |         |
| ≤50%                 | 7 (100)  | 165 (89.2) | 17 (77.3) | 0.160   |
| >50%                 | 0 (0.0)  | 20 (10.8)  | 5 (22.7)  |         |
| <b>Mucus</b>         |          |            |           |         |
| <10%                 | 4 (57.1) | 131 (70.8) | 13 (59.1) | 0.416   |
| ≥10%                 | 3 (42.9) | 54 (29.2)  | 9 (40.9)  |         |
| <b>TSR</b>           |          |            |           |         |
| Stroma-low           | 7 (100)  | 125 (66.1) | 13 (59.1) | 0.130   |
| Stroma-high          | 0 (0.0)  | 64 (33.9)  | 9 (40.9)  |         |
| <b>Tumor Budding</b> |          |            |           |         |
| Low (<5)             | 7 (100)  | 150 (79.4) | 19 (86.4) | 0.439   |
| Intermediate (5-9)   | 0 (0.0)  | 28 (14.8)  | 1 (4.5)   |         |
| High (≥10)           | 0 (0.0)  | 11 (5.8)   | 2 (9.1)   |         |

**Table S3.** Correlation between histopathologic features and pathologic T-stage. TILs = tumor infiltrating lymphocytes, TSR = tumor-stroma ratio. P-values are derived from an overall comparison between pathologic T-stages.
