# Supplementary material for: Correlation of Immunological and Histopathological Features with Gene Expression-Based Classifiers in Colon Cancer Patients
Source: MDPI journal article supplement (doi:10.3390/ijms232012707), 2022-10-21
Supplement: s1 [file s1]

|                                | CRIS-A vs. Rest |                  |         | CRIS-B vs. Rest |                 |         | CRIS-C vs. Rest |                 |         | CRIS-D vs. Rest |                 |         | CRIS-E vs. Rest |                 |         |
|--------------------------------|-----------------|------------------|---------|-----------------|-----------------|---------|-----------------|-----------------|---------|-----------------|-----------------|---------|-----------------|-----------------|---------|
|                                | OR              | 95% CI           | p-value | OR              | 95% CI          | p-value | OR              | 95% CI          | p-value | OR              | 95% CI          | p-value | OR              | 95% CI          | p-value |
| <b>TILs</b><br>High vs. Low    | 2.507           | 1.280-<br>4.908  | 0.006   | 2.347           | 1.079-<br>5.105 | 0.028   | 0.272           | 0.109-<br>0.677 | 0.003   | 0.533           | 0.194-<br>1.460 | 0.215   | 0.644           | 0.209-<br>1.984 | 0.441   |
| <b>Mucus</b><br>>50% vs ≤50%   | 11.796          | 4.418-<br>31.491 | <0.001  | 0.971           | 0.312-<br>3.025 | 0.959   | 0.087           | 0.012-<br>0.661 | 0.003   | 0.197           | 0.026-<br>1.508 | 0.084   | 0.132           | 0.008-<br>2.246 | 0.085   |
| <b>Mucus</b><br>≥10% vs <10%   | 20.510          | 9.632-<br>43.676 | <0.001  | 0.741           | 0.326-<br>1.683 | 0.473   | 0.164           | 0.067-<br>0.405 | <0.001  | 0.180           | 0.053-<br>0.611 | 0.002   | 0.288           | 0.083-<br>1.002 | 0.039   |
| <b>Stroma</b><br>High vs. Low  | 0.803           | 0.422-<br>1.525  | 0.502   | 0.644           | 0.284-<br>1.456 | 0.288   | 0.990           | 0.532-<br>1.843 | 0.976   | 1.861           | 0.893-<br>3.882 | 0.094   | 1.134           | 0.475-<br>2.706 | 0.777   |
| <b>Budding</b><br>High vs. Low | 0.464           | 0.194-<br>1.111  | 0.080   | 2.247           | 0.998-<br>5.059 | 0.046   | 1.130           | 0.544-<br>2.348 | 0.744   | 1.057           | 0.427-<br>2.617 | 0.904   | 0.777           | 0.252-<br>2.397 | 0.660   |

**Table S5.** Odds Ratios with 95% confidence interval calculated as the likelihood for assignment into a specific CRIS subtype if scored into the highest histopathologic category (i.e. TILs-high, Mucus >50%, Mucus ≥10%, Stroma-high and Budding-high). CRIS = colorectal cancer intrinsic subtypes, OR = odds ratio, CI = confidence interval, TILs = tumor infiltrating lymphocytes
