# Supplementary material for: Correlation of Immunological and Histopathological Features with Gene Expression-Based Classifiers in Colon Cancer Patients
Source: MDPI journal article supplement (doi:10.3390/ijms232012707), 2022-10-21
Supplement: s1 [file s1]

|                                | CMS1 vs. Rest |              |                | CMS2 vs. Rest |             |                | CMS3 vs. Rest |              |                | CMS4 vs. Rest |             |                |
|--------------------------------|---------------|--------------|----------------|---------------|-------------|----------------|---------------|--------------|----------------|---------------|-------------|----------------|
|                                | OR            | 95% CI       | <i>p-value</i> | OR            | 95% CI      | <i>p-value</i> | OR            | 95% CI       | <i>p-value</i> | OR            | 95% CI      | <i>p-value</i> |
| <b>TILs</b><br>High vs. Low    | 5.587         | 2.704-11.543 | <0.001         | 0.256         | 0.109-0.605 | 0.001          | 2.240         | 1.056-4.751  | 0.033          | 0.287         | 0.115-0.715 | 0.005          |
| <b>Mucus</b><br>>50% vs. ≤50%  | 3.152         | 1.302-7.628  | 0.008          | 0.032         | 0.002-0.530 | <0.001         | 1.493         | 0.554-4.024  | 0.426          | 1.522         | 0.633-3.661 | 0.346          |
| <b>Mucus</b><br>≥10% vs. <10%  | 3.423         | 1.714-6.837  | <0.001         | 0.076         | 0.026-0.219 | <0.001         | 5.836         | 2.779-12.256 | <0.001         | 0.597         | 0.301-1.184 | 0.138          |
| <b>Stroma</b><br>High vs. Low  | 0.627         | 0.295-1.329  | 0.220          | 0.576         | 0.309-1.072 | 0.080          | 1.086         | 0.5286-2.233 | 0.822          | 2.327         | 1.263-4.289 | 0.006          |
| <b>Budding</b><br>High vs. Low | 1.354         | 0.606-3.028  | 0.459          | 0.636         | 0.300-1.352 | 0.238          | 0.409         | 0.137-1.222  | 0.100          | 2.040         | 1.009-4.126 | 0.045          |

**Table S4.** Odds Ratios with 95% confidence interval calculated as the likelihood for assignment into a specific CMS subtype if scored into the highest histopathologic category (i.e. TILs-high, Mucus >50%, Mucus ≥10%, Stroma-high and Budding-high). CMS = consensus molecular subtype, OR = odds ratio, CI = confidence interval, TILs = tumor infiltrating lymphocytes
